# Supplementary material for: Widespread insecticide resistance in Aedes aegypti L. from New Mexico, U.S.A
Source: PubMed Central journal article supplement (PMC6386485; doi:10.1371/journal.pone.0212693), 2019-02-22
Supplement: pone.0212693.s001.pdf [file pone.0212693.s001.pdf]

## Deltamethrin Resistance Tests: Alamogordo strain

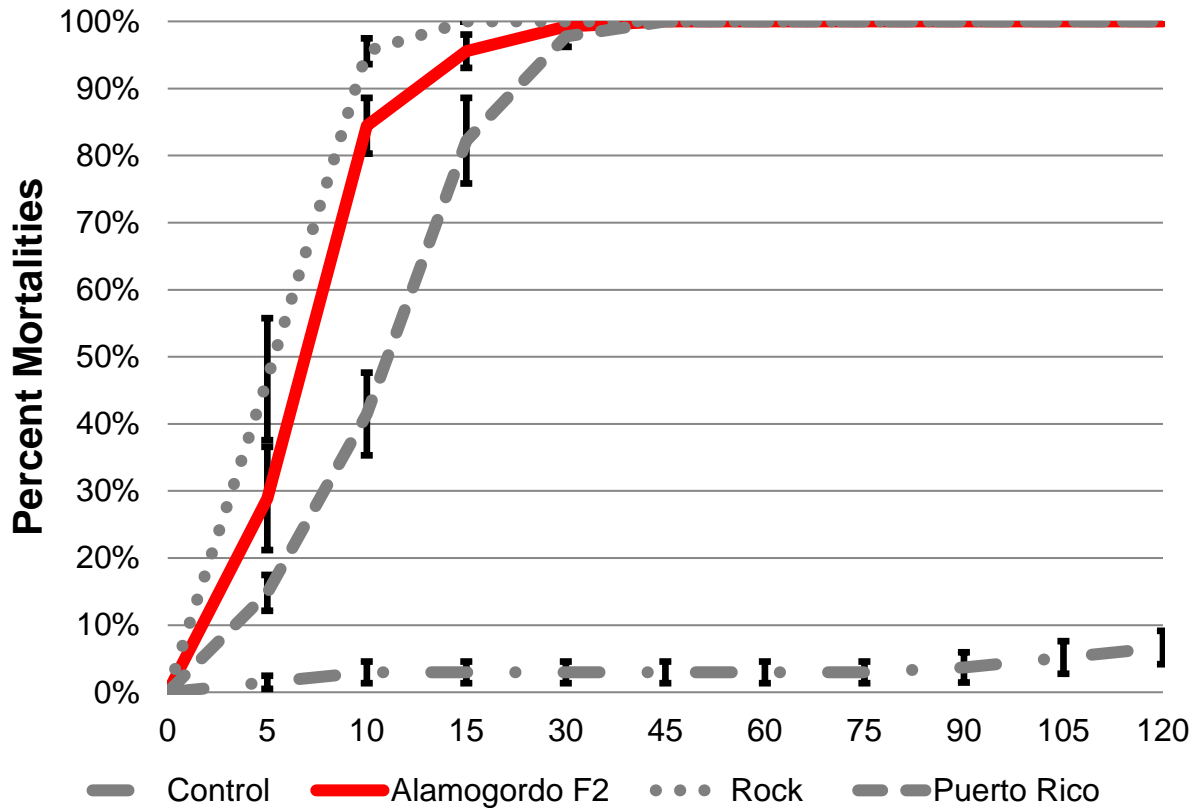

**Figure A. Deltamethrin IR Bottle Test Results: 10.5 ug/bottle.** Shown are means and standard error bars for different groups of mosquitoes. Rock is considered a pyrethroid-sensitive strain. Puerto Rico is considered a pyrethroid-resistant strain. The control was treated with acetone only.

**Results-** The control (Acetone) mortality curve was significantly different ( $P < 0.0001$ ) from the curves for all other treatments with little to no mortalities. Kaplan Meier statistical analysis confirmed that there was a significant difference between the the curves plotted for the deltamethrin-exposed Rock Strain and the Alamogordo Strain ( $P < .0001$ ). The curve plotted for the Puerto Rico Strain (a known resistant strain) is significantly different than that plotted for the Alamogordo Strain ( $P < .0001$ ). The curves plotted for the Puerto Rico strain and the Rock strain were also significantly different from each other ( $P < .0001$ ).

**Conclusion-** Although we found small but statistical significant differences in the survival curve of the ROCK control and the curve plotted for mosquitoes from Alamogordo, the comparison with the curve plotted for the resistant Puerto Rico strain suggests that the Alamogordo strain is sensitive to deltamethrin.

## Deltamethrin Resistance Tests: Las Cruces strain

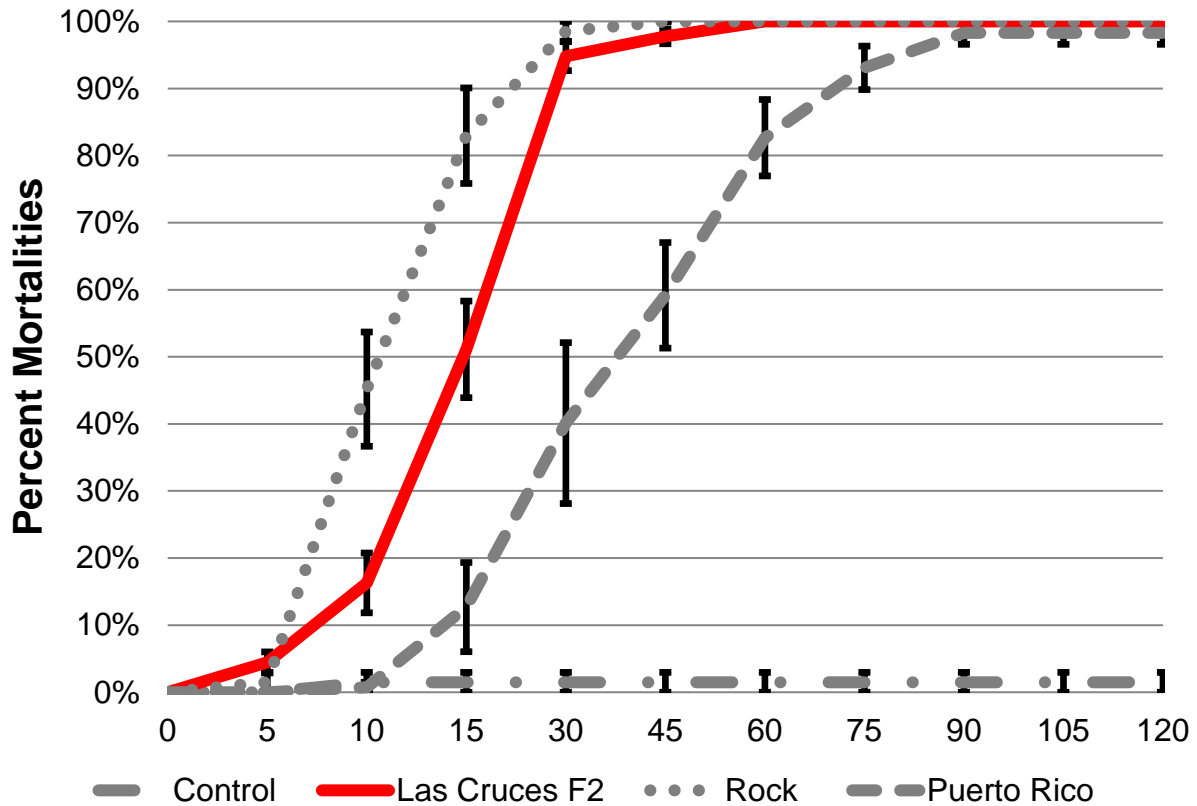

**Figure B. Deltamethrin IR Bottle Test Results: 10.5 ug/bottle.** Shown are means and standard error bars for different groups of mosquitoes. Rock is considered a pyrethroid-sensitive strain. Puerto Rico is considered a pyrethroid-resistant strain. The control was treated with acetone only.

**Results-** The control (Acetone) mortality curve was significantly different ( $P < 0.0001$ ) from the curves for all other treatments with little to no mortalities. Kaplan Meier statistical analysis confirmed that there was a significant difference between the curves plotted for the deltamethrin-exposed Rock Strain and the Las Cruces Strain ( $P < .0001$ ). The curve plotted for the Puerto Rico Strain (a known resistant strain) is significantly different than that plotted for the Las Cruces Strain ( $P < .0001$ ). The curves plotted for the Puerto Rico strain and the Rock strain were also significantly different from each other ( $P < .0001$ ).

**Conclusion-** the Las Cruces *Aedes aegypti* strain showed resistance toward deltamethrin.

## Deltamethrin Resistance Tests: Carlsbad strain

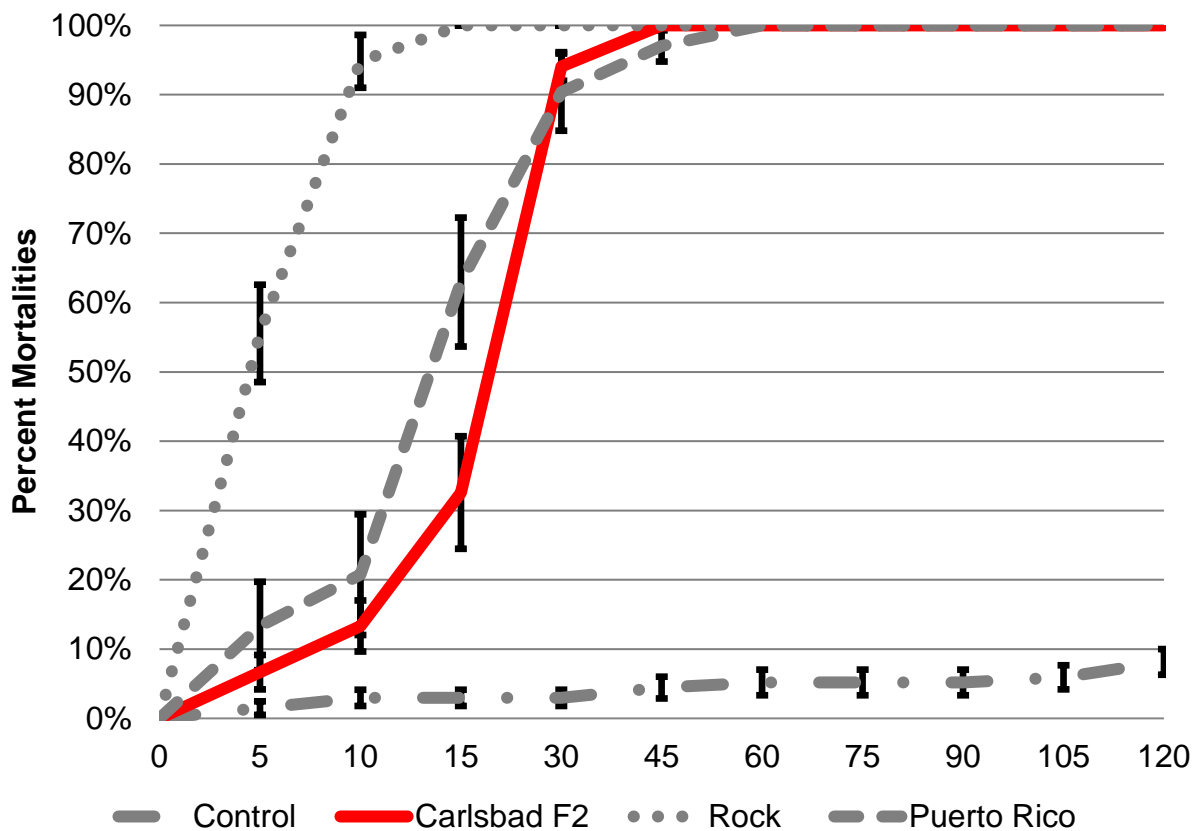

**Figure C. Deltamethrin IR Bottle Test Results: 10.5 ug/bottle.** Shown are means and standard error bars for different groups of mosquitoes. Rock is considered a pyrethroid-sensitive strain. Puerto Rico is considered a pyrethroid-resistant strain. The control was treated with acetone only.

**Results-** The control (Acetone) mortality curve was significantly different ( $P < 0.0001$ ) from the curves for all other treatments with little to no mortalities. Kaplan Meier statistical analysis confirmed that there was a significant difference between the the curves plotted for the deltamethrin-exposed Rock Strain and the Carlsbad Strain ( $P < .0001$ ). The curve plotted for the Puerto Rico Strain (a known resistant strain) is significantly different than that plotted for the Carlsbad Strain ( $P < .003$ ). The curves plotted for the Puerto Rico strain and the Rock strain were also significantly different from each other ( $P < .0001$ ).

**Conclusion-** The Carlsbad *Aedes aegypti* strain shows resistance to deltamethrin.

## Deltamethrin Resistance Tests: Roswell strain

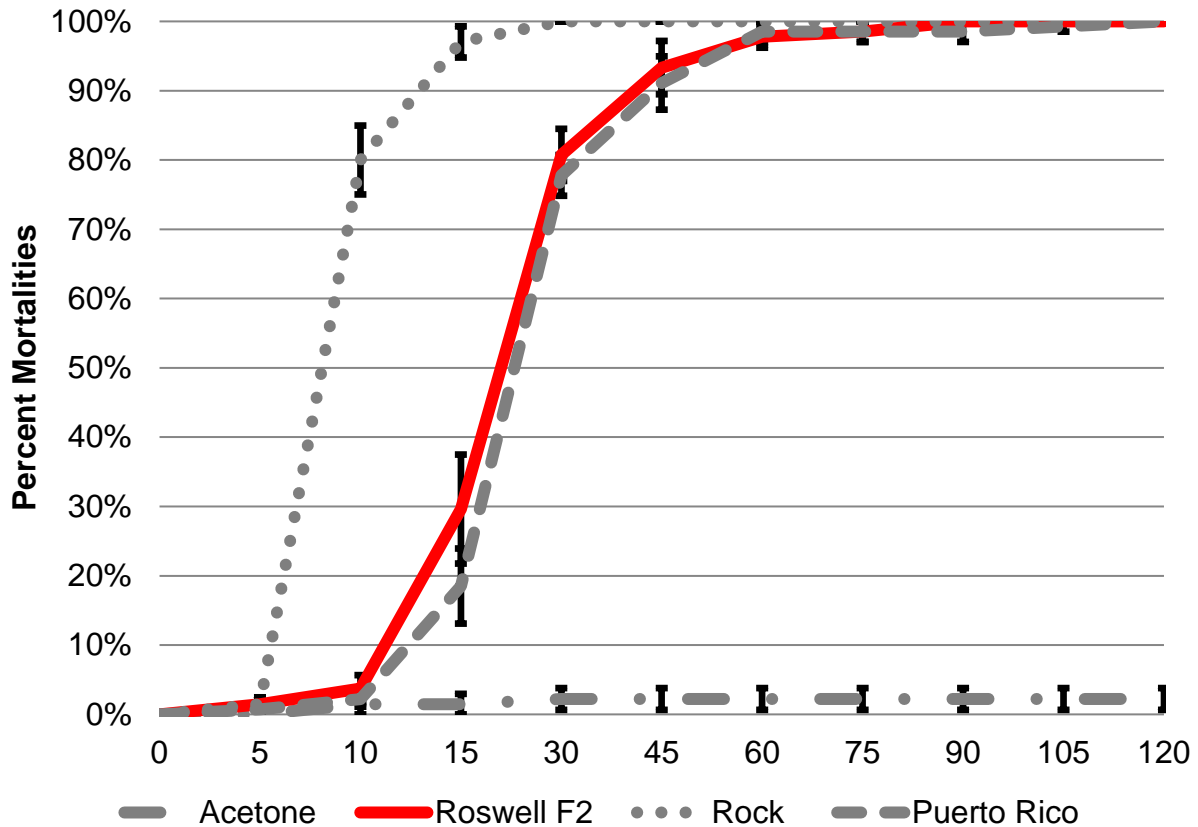

**Figure D. Deltamethrin IR Bottle Test Results: 10.5 ug/bottle.** Shown are means and standard error bars for different groups of mosquitoes. Rock is considered a pyrethroid-sensitive strain. Puerto Rico is considered a pyrethroid-resistant strain. The control was treated with acetone only.

**Results-** The control (Acetone) mortality curve was significantly different ( $P < 0.0001$ ) from the curves for all other treatments with little to no mortalities. Kaplan Meier statistical analysis confirmed that there was a significant difference between the curves plotted for the deltamethrin-exposed Rock Strain and the Roswell Strain ( $P < 0.0001$ ). The curve plotted for the Puerto Rico Strain (a known resistant strain) is not significantly different than that plotted for the Roswell Strain ( $P = .091$ ). The curves plotted for the Puerto Rico strain and the Rock strain were also significantly different from each other ( $P < 0.0001$ ).

**Conclusion-** The Roswell *Aedes aegypti* strain shows resistance towards deltamethrin.

## *Etofenprox Resistance Tests: Roswell strain*

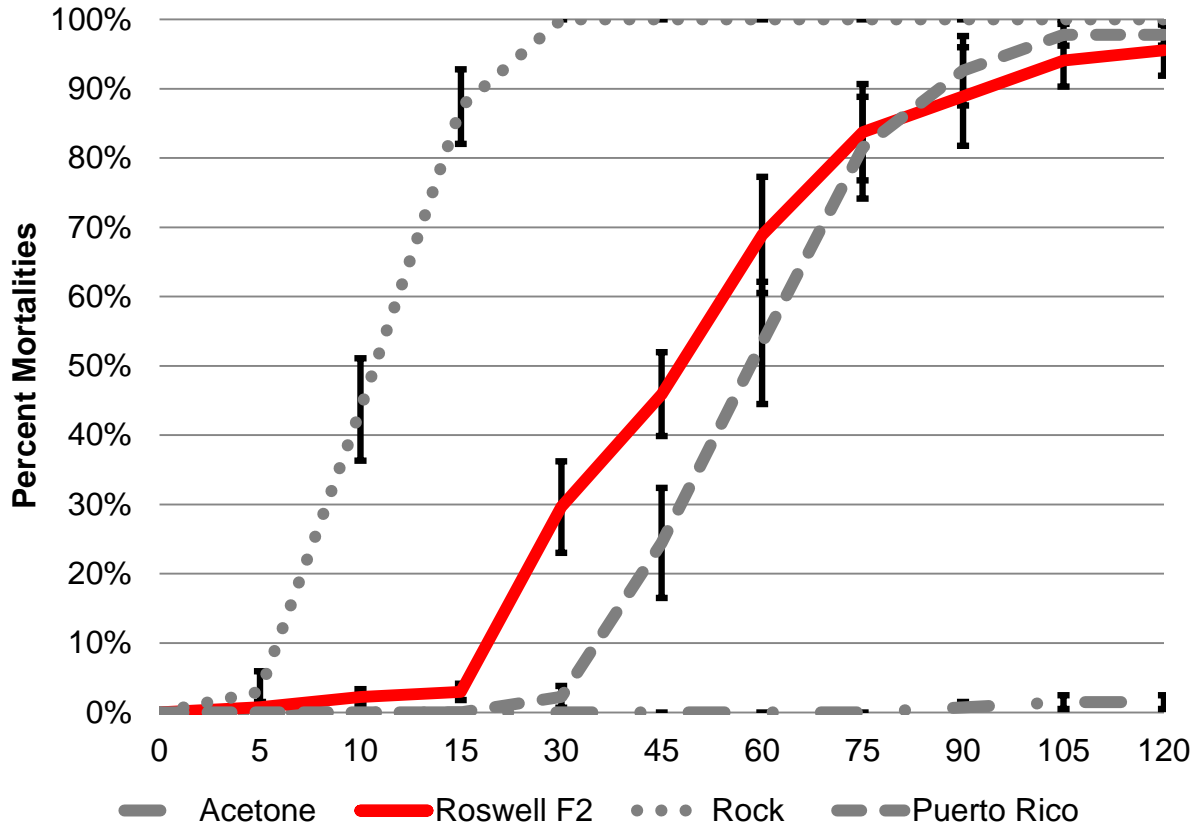

**Figure E. Etofenprox IR Bottle Test Results: 37.5 ug/bottle.** Shown are means and standard error bars for different groups of mosquitoes. Rock is considered a pyrethroid-sensitive strain. Puerto Rico is considered a pyrethroid-resistant strain. The control was treated with acetone only.

**Results-** The control (Acetone) mortality curve was significantly different ( $P < 0.0001$ ) from the curves for all other treatments with little to no mortalities. Kaplan Meier statistical analysis confirmed that there was a significant difference between the curves plotted for the etofenprox-exposed Rock Strain and the Roswell Strain ( $P < .0001$ ). The curve plotted for the Puerto Rico Strain (a known resistant strain) is significantly different than that plotted for the Roswell Strain ( $P = .034$ ). The curves plotted for the Puerto Rico strain and the Rock strain were also significantly different from each other ( $P < .0001$ ).

**Conclusion-** The Roswell *Aedes aegypti* strain shows resistance towards etofenprox.

## Etofenprox Resistance Tests: Las Cruces strain

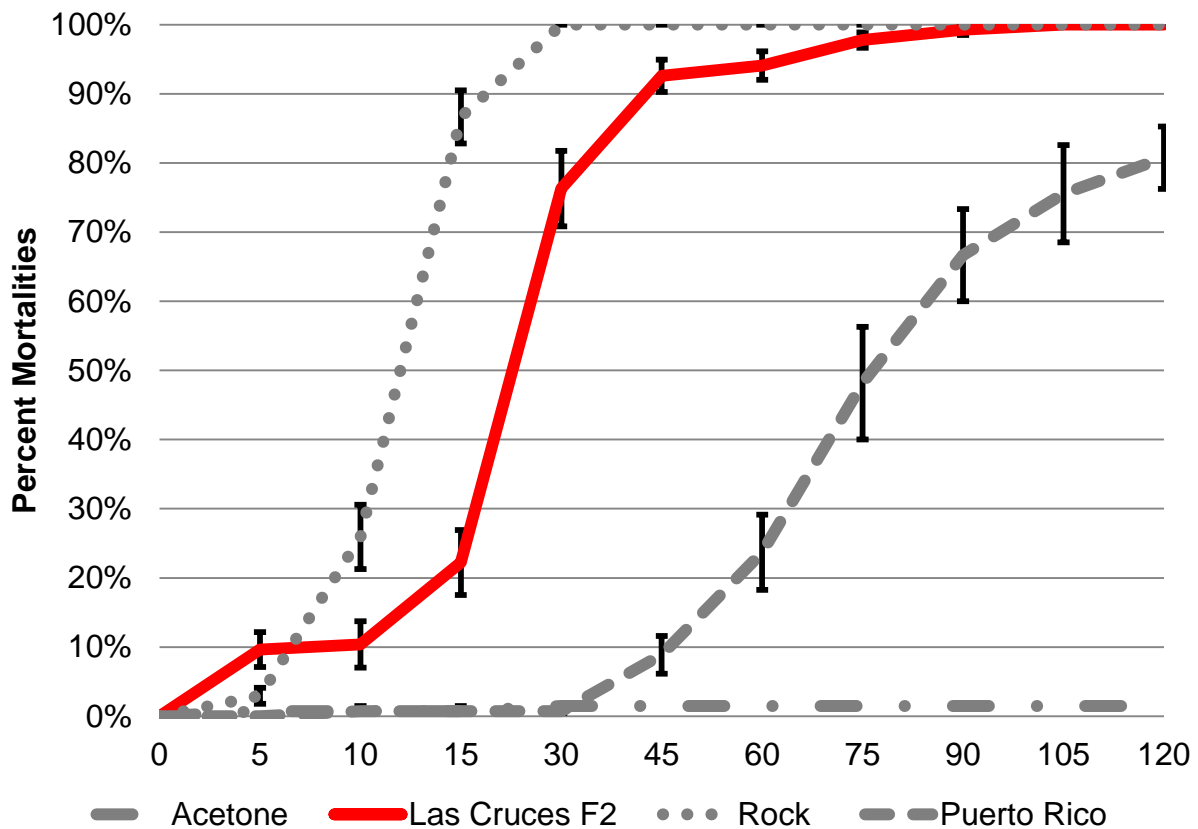

**Figure F. Etofenprox IR Bottle Test Results: 37.5 ug/bottle.** Shown are means and standard error bars for different groups of mosquitoes. Rock is considered a pyrethroid-sensitive strain. Puerto Rico is considered a pyrethroid-resistant strain. The control was treated with acetone only.

**Results-** The control (Acetone) mortality curve was significantly different ( $P < 0.0001$ ) from the curves for all other treatments with little to no mortalities. Kaplan Meier statistical analysis confirmed that there was a significant difference between the curves plotted for the etofenprox-exposed Rock Strain and the Las Cruces Strain ( $P < 0.0001$ ). The curve plotted for the Puerto Rico Strain (a known resistant strain) is significantly different than that plotted for the Las Cruces Strain ( $P < 0.0001$ ). The curves plotted for the Puerto Rico strain and the Rock strain were also significantly different from each other ( $P < 0.0001$ ).

**Conclusion-** The Las Cruces *Aedes aegypti* strain shows resistance towards etofenprox.

## Chlorpyrifos Resistance Tests: Las Cruces strain

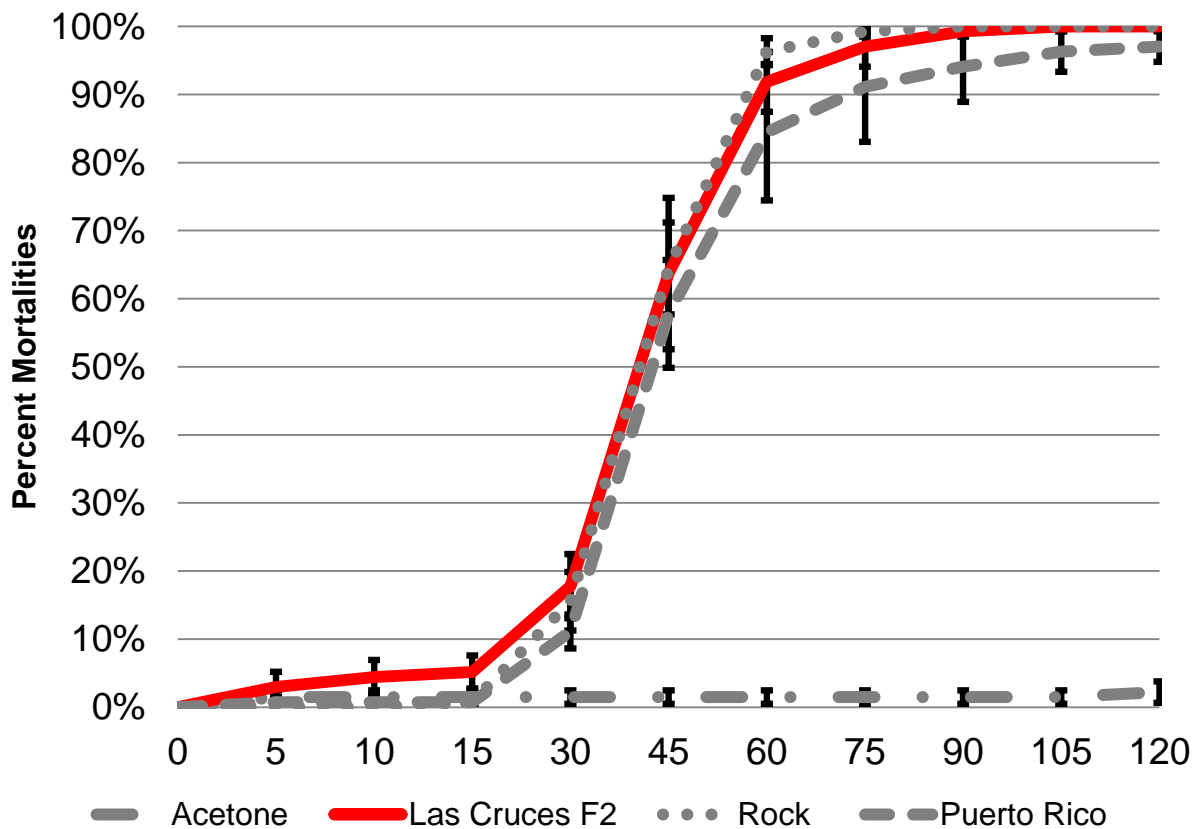

**Figure G. Chlorpyrifos IR Bottle Test Results: 40 ug/bottle.** Shown are means and standard error bars for different groups of mosquitoes. Rock is considered a pyrethroid-sensitive strain. Puerto Rico is considered a pyrethroid-resistant strain. The control was treated with acetone only.

**Results-** The control (Acetone) mortality curve was significantly different ( $P < 0.0001$ ) from the curves for all other treatments with little to no mortalities. Kaplan Meier statistical analysis confirmed that there was no significant difference between the curves plotted for the chlorpyrifos-exposed Rock Strain and the Las Cruces Strain ( $P = .589$ ). The curve plotted for the Puerto Rico Strain (a known resistant strain) is significantly different than that plotted for the Las Cruces Strain ( $P = .014$ ). The curves plotted for the Puerto Rico strain and the Rock strain were also significantly different from each other ( $P = .005$ ).

**Conclusion-** The Las Cruces *Aedes aegypti* strain is sensitive towards chlorpyrifos.

## Chlorpyrifos Resistance Tests: Alamogordo strain

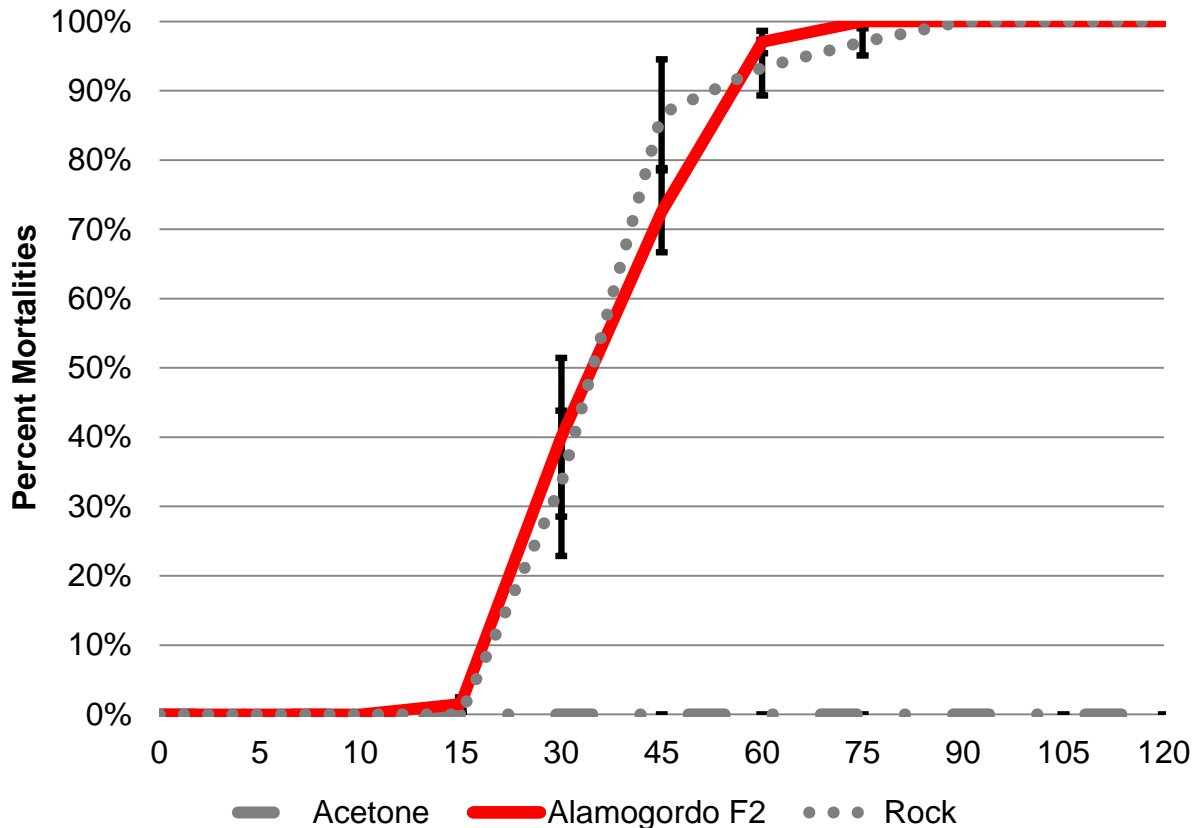

**Figure H. Chlorpyrifos IR Bottle Test Results: 40 ug/bottle.** Shown are means and standard error bars for different groups of mosquitoes. Rock is considered a pyrethroid-sensitive strain. The control was treated with acetone only.

**Results-** The control (Acetone) mortality curve was significantly different ( $P < 0.0001$ ) from the curves for all other treatments with little to no mortalities. Kaplan Meier statistical analysis confirmed that there was not a significant difference between the curves plotted for the chlorpyrifos-exposed Rock Strain and the Alamogordo Strain ( $P = .984$ ).

**Conclusion-** The Alamogordo *Aedes aegypti* strain is sensitive to chlorpyrifos.



## Chlorpyrifos Resistance Tests: Carlsbad strain

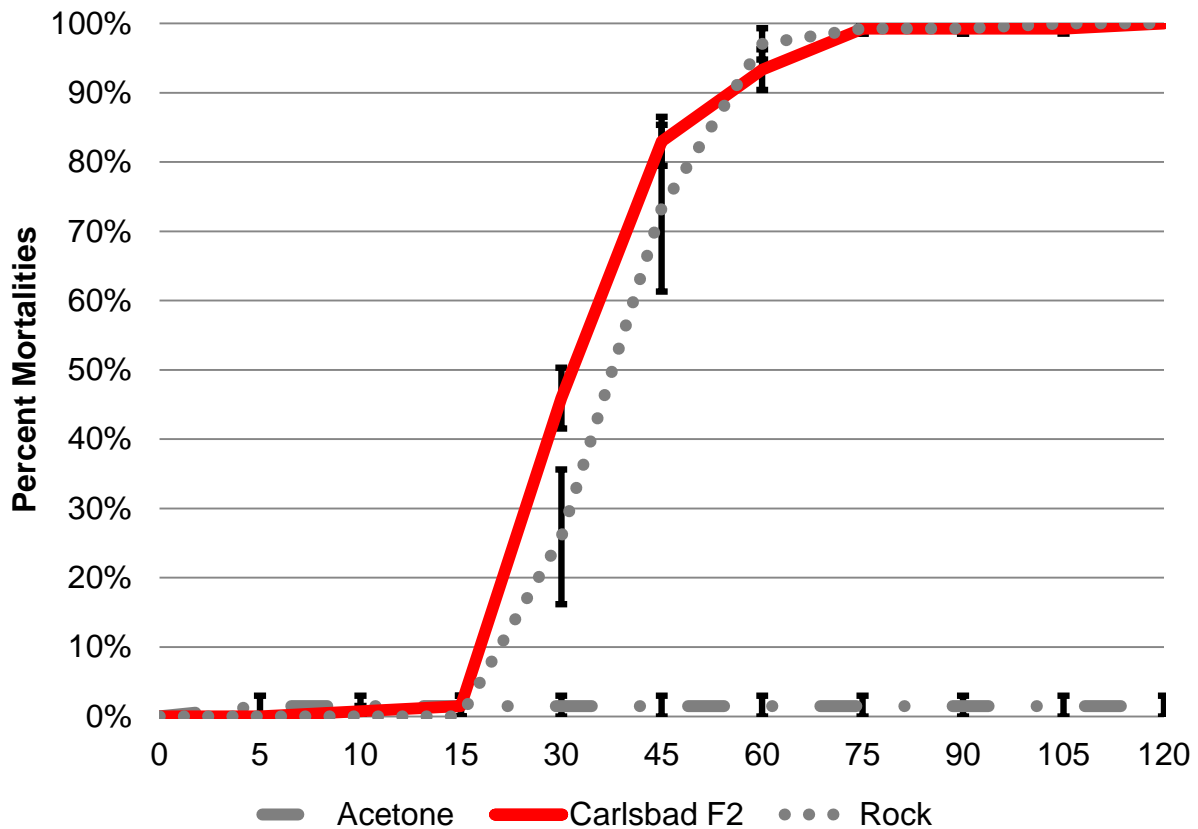

**Figure I. Chlorpyrifos IR Bottle Test Results: 40 ug/bottle.** Shown are means and standard error bars for different groups of mosquitoes. Rock is considered a pyrethroid-sensitive strain. The control was treated with acetone only.

**Results-** The control (Acetone) mortality curve was significantly different ( $P < 0.0001$ ) from the curves for all other treatments with little to no mortalities. Kaplan Meier statistical analysis confirmed that there was a significant difference between the curves plotted for the chlorpyrifos-exposed Rock Strain and the Carlsbad Strain ( $P = .028$ ).

**Conclusion-** The Carlsbad *Aedes aegypti* strain shows sensitivity towards chlorpyrifos.

## Chlorpyrifos Resistance Tests: Roswell strain

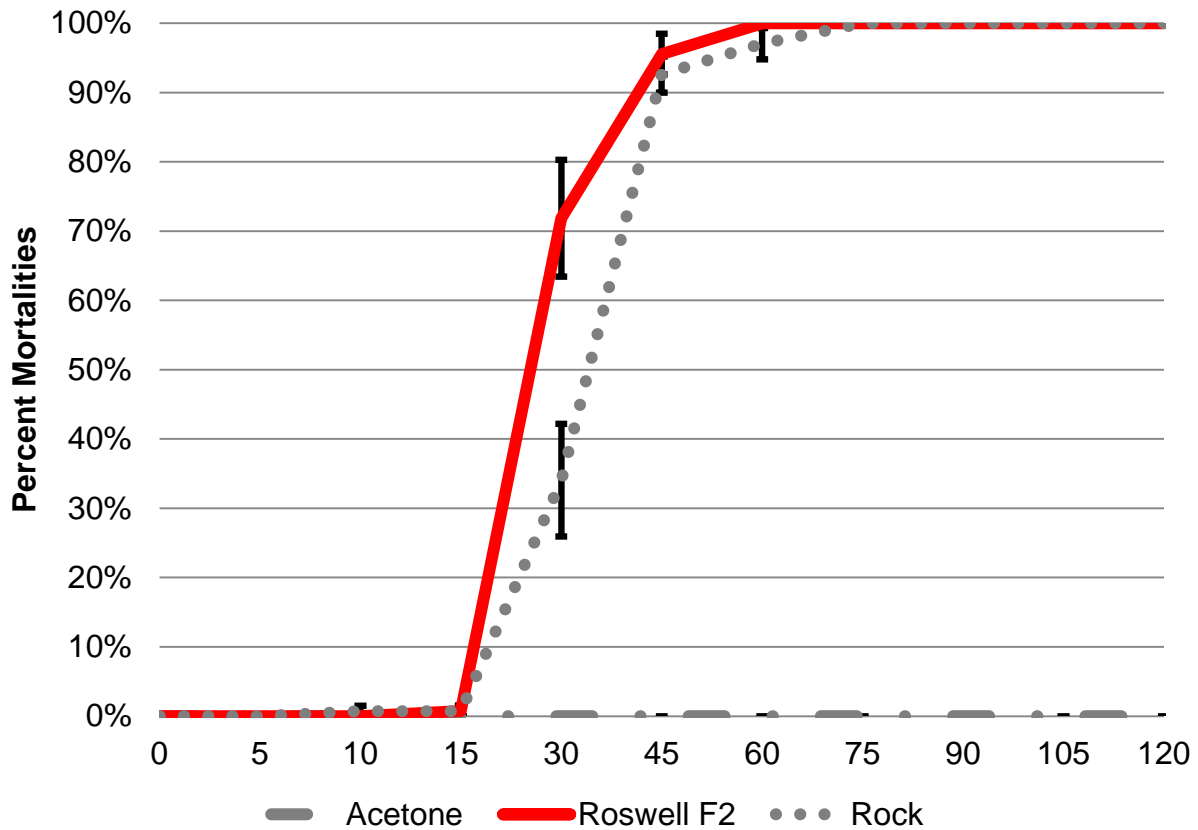

**Figure J. Chlorpyrifos IR Bottle Test Results: 40 ug/bottle.** Shown are means and standard error bars for different groups of mosquitoes. Rock is considered a pyrethroid-sensitive strain. The control was treated with acetone only.

**Results-** The control (Acetone) mortality curve was significantly different ( $P < 0.0001$ ) from the curves for all other treatments with little to no mortalities. Kaplan Meier statistical analysis confirmed that there was a significant difference between the the curves plotted for the chlorpyrifos-exposed Rock Strain and the Roswell Strain ( $P < .0001$ ).

**Conclusion-** The Roswell *Aedes aegypti* strain is sensitive to chlorpyrifos.

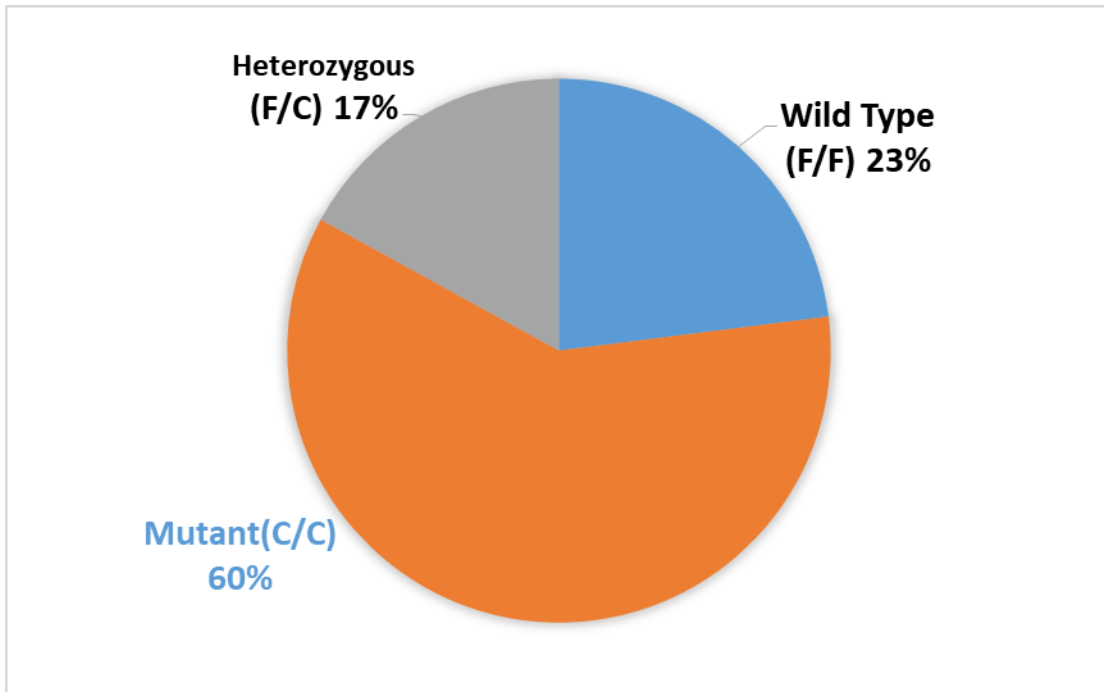

**Figure K: kdr position 1534 Genotypes in 50 mosquitoes from New Mexico.** The figure shows the percentage of heterozygous and homozygous mosquitoes. The resistant mutants are shown in orange, wild type in blue, and heterozygous in grey.



|                    |                                                                                                                                                                                    |      |      |  |
|--------------------|------------------------------------------------------------------------------------------------------------------------------------------------------------------------------------|------|------|--|
|                    | <table border="1" style="display: inline-table; border-collapse: collapse;"> <tr> <td style="padding: 2px 10px;">1018</td> <td style="padding: 2px 10px;">1023</td> </tr> </table> | 1018 | 1023 |  |
| 1018               | 1023                                                                                                                                                                               |      |      |  |
| NC_035109_egypt    | MLVGDVSCIPFFLATVVIGNLVGLNLFLLALLSNFGSSSL SAPTADNETNKIAEAFNRIS                                                                                                                      | 1060 |      |  |
| NW_004765908_Musca | MYVGDVSCIPFFLATVVIGNLVGLNLFLLALLSNFGSSSL SAPTADNDTNKIAEAFNRIS                                                                                                                      | 1053 |      |  |
|                    | <table border="1" style="display: inline-table; border-collapse: collapse;"> <tr> <td style="padding: 2px 10px;">1011</td> <td style="padding: 2px 10px;">1016</td> </tr> </table> | 1011 | 1016 |  |
| 1011               | 1016                                                                                                                                                                               |      |      |  |
| NC_035109_egypt    | RFSNWIKSNIANALKFVKNKLSQIASVQPAGEQHNHLSWIWNEGKVCPCISAHEGENE                                                                                                                         | 1120 |      |  |
| NW_004765908_Musca | RFKNWVKRNIADCFKLIRNKLTNQISDQ-----PSEHGDSNE                                                                                                                                         | 1089 |      |  |
|                    | :                                                                                                                                                                                  |      |      |  |
| NC_035109_egypt    | LELTPDDILADGLLKKGVKEHNQLEVAIGDGMEFTIHGDLKNGKKNKQLMNSKIVIGNS                                                                                                                        | 1180 |      |  |
| NW_004765908_Musca | LELGHDEIMGDGLIKKGMKGETQLEVAIGDGMEFTIHGDMKNKPKKSKFINNNTMIIGNS                                                                                                                       | 1149 |      |  |
|                    | *** * : * : . * * : * * * * : * . . * * * * * * * * * * * * * * * * : * * : * : * * * * : * * * * * * *                                                                            |      |      |  |
| NC_035109_egypt    | ISNHQDNKLEHELNHRGMSLQDDDTASIKSYGSHKRNPFKDESHKGSAAETMEGEKRDVS                                                                                                                       | 1240 |      |  |
| NW_004765908_Musca | I-NHQDNRELEHELNHRGLSIQDDDTASINSYGSHKRNPFKDESHKGSAAETIEGEKRDVS                                                                                                                      | 1208 |      |  |
|                    | * * * * * : * * * * * * * * * * * * * * * * * * * * * * * * * * * * * * * * * * * * * * * * * * *                                                                                  |      |      |  |
| NC_035109_egypt    | KEDLGIDEELDDECDGEEGPLDGLIIHADE-DEVIEDSPADCCPDNCYKKFPVLGDDD                                                                                                                         | 1299 |      |  |
| NW_004765908_Musca | KEDLGLDEELDEEAGDEQLDGLDIIHAQNDDIIDDYPADCFPDSYKFKPILAGDED                                                                                                                           | 1268 |      |  |
|                    | * * * * * : * * * * * * * : * : * * * * * : * * : * * * * * * * * * * * * * * * * * * * * * * *                                                                                    |      |      |  |
| NC_035109_egypt    | APFQGWANLRLKFTQLIENKVFETAVITMILLSLALALEDVHLPHRPILQDVLVYMDR                                                                                                                         | 1359 |      |  |
| NW_004765908_Musca | SPFQGWGNLRLKFTQLIENKVFETAVITMILMSSLALALEDVHLPRPVMQDILVYMDR                                                                                                                         | 1328 |      |  |
|                    | : * * * * * . * * * * * * * * * * * * * * * * * * * * * * * * * * * * * * : * * : * * * * * * * *                                                                                  |      |      |  |
| NC_035109_egypt    | IFTVIFLEMLIKWLALGFRVYFTNAWCWLD FIVMVSLINVASLCGAGGIQAFKTMRT                                                                                                                         | 1419 |      |  |
| NW_004765908_Musca | IFTVIFLEMLIKWLALGFKVYFTNAWCWLD FIVMVSLINLVAVWVGLNDIAVFRSMRT                                                                                                                        | 1388 |      |  |
|                    | * * * * * * * * * * * * * * * * * * * * * * * * * * * * * * * * * * . * . . * * : * * * *                                                                                          |      |      |  |
| NC_035109_egypt    | LRLRPLRAMSRMQMRVVNALVQAIPISFNVLVCLIFWLI FAIMGVQLFAGKYFKCV                                                                                                                          | 1479 |      |  |
| NW_004765908_Musca | LRLRPLRAVSRWEGMKVVNALVQAIPISFNVLVCLIFWLI FAIMGVQLFAGKYFKCK                                                                                                                         | 1448 |      |  |
|                    | * * * * * * * : * * : * * * * * * * * * * * * * * * * * * * * * * * * * * * * * * * * * * * *                                                                                      |      |      |  |
| NC_035109_egypt    | DNKNTTLSHEIIPDVNACVAENYTWNSPMNFDHVKGAYLCLFQVATFKGWIQIMND AID                                                                                                                       | 1539 |      |  |
| NW_004765908_Musca | DGNDTVLSHEIIPNRNACKSENYTWNSAMNFDHVGNAYLCLFQVATFKGWIQIMND AID                                                                                                                       | 1508 |      |  |
|                    | * * . * . * * * * * * * * * * * * * * * * * * * * * * * * * * * * * * * * * * * * * * * * * * *                                                                                    |      |      |  |
|                    | <table border="1" style="display: inline-table; border-collapse: collapse;"> <tr> <td style="padding: 2px 10px;">1551</td> <td style="padding: 2px 10px;">1565</td> </tr> </table> | 1551 | 1565 |  |
| 1551               | 1565                                                                                                                                                                               |      |      |  |
| NC_035109_egypt    | SREVGKQPIRETNIYMVLYFVFFIFIGSFRTLNLFI GV I IDNFNQK KAGGSLEMFMTE                                                                                                                     | 1599 |      |  |
| NW_004765908_Musca | SREVDKQPIRETNIYMVLYFVFFIFIGSFRTLNLFI GV I IDNFNQK KAGGSLEMFMTE                                                                                                                     | 1568 |      |  |
|                    | * * * * . * * * * * * * * * * * * * * * * * * * * * * * * * * * * * * * * * * * * * * * * * *                                                                                      |      |      |  |
|                    | <table border="1" style="display: inline-table; border-collapse: collapse;"> <tr> <td style="padding: 2px 10px;">1520</td> <td style="padding: 2px 10px;">1534</td> </tr> </table> | 1520 | 1534 |  |
| 1520               | 1534                                                                                                                                                                               |      |      |  |
| NC_035109_egypt    | DQKKYNNAMKMGSKKPLKAI PRWRPQAIVFEIVTNKKFDMIIMLFI GFNMLTMTLDH                                                                                                                        | 1659 |      |  |
| NW_004765908_Musca | DQKKYNNAMKMGSKKPLKAI PRWRPQAIVFEIVTDKKFDI IIMLFI GLNMF TMTLDR                                                                                                                      | 1628 |      |  |
|                    | * * * * * * * * * * * * * * * * * * * * * * * * * * * * * * * * * * * * * * * * * * * * * * * *                                                                                    |      |      |  |
| NC_035109_egypt    | YKQTDTFSAVLDYLNMFICIFSSCELMKIFALRYHYFIEPWNLFDFVVLVLSILGLVLS                                                                                                                        | 1719 |      |  |
| NW_004765908_Musca | YDASEAYNVDLKNLGI FVVFISGECLLIFALRYHYFKEPWNLFDFVVLVLSILGLVLS                                                                                                                        | 1688 |      |  |
|                    | * . : : : . * * * * * * * : * * * * * * * * * * * * * * * * * * * * * * * * * * * * * * * * *                                                                                      |      |      |  |
| NC_035109_egypt    | DLIEKYFVSPPTLLRVRVAVGRVLRVLKGA GIRTLLFALAMSLPALFNICLLLV FVMF                                                                                                                       | 1779 |      |  |
| NW_004765908_Musca | DLIEKYFVSPPTLLRVRVAVGRVLRVLKGA GIRTLLFALAMSLPALFNICLLLV FVMF                                                                                                                       | 1748 |      |  |
|                    | * : * * * * * * * * * * * * * * * * * * * * * * * * * * * * * * * * * * * * * * * * * * * * * * *                                                                                  |      |      |  |
|                    | <table border="1" style="display: inline-table; border-collapse: collapse;"> <tr> <td style="padding: 2px 10px;">1794</td> </tr> </table>                                          | 1794 |      |  |
| 1794               |                                                                                                                                                                                    |      |      |  |
| NC_035109_egypt    | IFAIFGMSFFMHVYKXSGLDVYVFKTFGQSMILLFQ MSTSAGWDGVL DGI INEDECLPP                                                                                                                     | 1839 |      |  |
| NW_004765908_Musca | IFAIFGMSFFMHVKKXSGINAVYVFKTFGQSMILLFQ MSTSAGWDGVL DAI INEEDCPP                                                                                                                     | 1808 |      |  |
|                    | * * * * * * * * * * * * * * * * * * * * * * * * * * * * * * * * * * * * * * * * * * * * * * * *                                                                                    |      |      |  |
|                    | <table border="1" style="display: inline-table; border-collapse: collapse;"> <tr> <td style="padding: 2px 10px;">1763</td> </tr> </table>                                          | 1763 |      |  |
| 1763               |                                                                                                                                                                                    |      |      |  |
| NC_035109_egypt    | DNDKGYPGNCGSATIGITYLLAYLVISFLIVINMYIAVILENYSQATEDVQEGLTDDD YD                                                                                                                      | 1899 |      |  |
| NW_004765908_Musca | DNDKGYPGNCGSATVGTIFLLSYLVISFLIVINMYIAVILENYSQATEDVQEGLTDDD YD                                                                                                                      | 1868 |      |  |
|                    | * * * * * * * * * * * * * * * * * * * * * * * * * * * * * * * * * * * * * * * * * * * * * * * *                                                                                    |      |      |  |
| NC_035109_egypt    | MYYEIWQQFDPDGTQYIRYDQLSDFLDVLEPPLQIHKPNKYKI ISMDIPICRGDMMFCVD                                                                                                                      | 1959 |      |  |
| NW_004765908_Musca | MYYEIWQQFDPEGTQYIRYDQLSEFLDVLEPPLQIHKPNKYKI ISMDIPICRGDMMYCV                                                                                                                       | 1928 |      |  |
|                    | * * * * * * * * * * * * * * * * * * * * * * * * * * * * * * * * * * * * * * * * * * * * * * * *                                                                                    |      |      |  |
| NC_035109_egypt    | ILDALTKDFFARKGNPIEETAELGEVQARPDEVGYEPV SSTLWRQREEYCARVIQHAWRK                                                                                                                      | 2019 |      |  |
| NW_004765908_Musca | ILDALTKDFFARKGNPIEETGEIGEARPDETYD PVSSTLWRQREEYCAKLIQNAWRR                                                                                                                         | 1988 |      |  |
|                    | * * * * * * * * * * * * * * * * * * * * * * * * * * * * * * * * * * * * * * * * * * * * * * * *                                                                                    |      |      |  |
| NC_035109_egypt    | HKERQAGGGGDDTDADACNDDGDDGGGGAGDGGG SAGGGV T-SPGVGSGSIVGGGTTP                                                                                                                       | 2078 |      |  |
| NW_004765908_Musca | YKNGPPQEGDEG---EAAGGEDG AEGGEGEGSGGGGGGDDGG SATGATAAAAGATSP                                                                                                                        | 2044 |      |  |
|                    | : * : * * . . . . : * * . * * * * . * * * * . . . * : * * : * * * * : *                                                                                                            |      |      |  |

```

NC_035109_aegypt      GSGGGGSQANLGI VVEHNLSPKESP DGNNDPQGRQTAVLVESDGFVTKNGHRVVIHSRSP 2138
NW_004765908_Musca   SDPDAGEA--DGASVGGPLSPGCV---SGGSNGRQTAVLVESDGFVTKNGHKVVIHSRSP 2099
.. ..*      * * ***      ... :*****:*****

NC_035109_aegypt      SITRSADV      2147
NW_004765908_Musca   S-----      2100
*
```

**Figure L. Sequence alignment of the Para protein of *Aedes aegypti* and *Musca domestica*.** Kdr mutation sites are red and the respective location is given in boxes above and below the alignment.

| City         | Pesticides - Product Name                                                                                                                                                          | Pesticides - Active Ingredient                                                                                                                                                                                           |
|--------------|------------------------------------------------------------------------------------------------------------------------------------------------------------------------------------|--------------------------------------------------------------------------------------------------------------------------------------------------------------------------------------------------------------------------|
| Las Cruces   | not provided                                                                                                                                                                       | Etofenprox<br>Deltamethrin<br>Chlorpyrifos<br>Bifenthrin<br>Lambda Cyhalothrin                                                                                                                                           |
| T or C       | Prentox Aqua Perm-X UL 30-30<br>Altosid XR Briquets<br>Aqualuer 20-20                                                                                                              | Permethrin and Piperonyl Butoxide<br>(S)-Methoprene<br>Permethrin and Piperonyl Butoxide Technical                                                                                                                       |
| Roswell      | no info                                                                                                                                                                            | no info                                                                                                                                                                                                                  |
| Lordsburg    | none                                                                                                                                                                               | n/a                                                                                                                                                                                                                      |
| Alamogordo   | Vectobac                                                                                                                                                                           | <i>Bacillus thuringiensis</i> subsp. <i>israelensis</i>                                                                                                                                                                  |
| Clovis       | Delta Guard<br>Atrapa                                                                                                                                                              | Deltamethrin<br>Malathion                                                                                                                                                                                                |
| Sunland Park | Altosid products (2015, 2016, 2017)<br>Fyfanon (2016, 2017)<br>Kontrol 4x4 (2015)<br>Vectolex CG products (2013, 2014)<br>Evoluer 30-30 (2013, 2014)<br>Sustain MBG Pellets (2013) | (S)-Methoprene<br>Malathion<br>Permethrin and Piperonyl Butoxide<br><i>Bacillus sphaericus</i><br>Permethrin and Piperonyl Butoxide<br><i>Bacillus thuringiensis</i> subsp. <i>israelensis</i>                           |
| Portales     | no info                                                                                                                                                                            | no info                                                                                                                                                                                                                  |
| Carlsbad     | Mosquito Master<br>Delta Guard<br>Altosid<br>Fourstar BTI<br>Natar™ products<br>Permex<br>Pursuit<br>PyroFos 1.5 ULV (discontinued by the manufacturer)                            | Chlorpyrifos and Permethrin<br>Deltamethrin<br>(S)-Methoprene<br><i>Bacillus thuringiensis</i> subsp. <i>Israelensis</i><br>Spinosad (soil bacterium)<br>Permethrin<br>Permethrin and Piperonyl Butoxide<br>Chlorpyrifos |
| Lovington    | Mosquito Master<br>BTI Briquets                                                                                                                                                    | Chlorpyrifos and Permethrin<br><i>Bacillus thuringiensis</i> subsp. <i>Israelensis</i>                                                                                                                                   |
| Deming       | not provided                                                                                                                                                                       | Etofenprox<br>Deltamethrin<br>Chlorpyrifos<br>Bifenthrin<br>Lambda Cyhalothrin                                                                                                                                           |
| Socorro      | not provided                                                                                                                                                                       | Permethrin                                                                                                                                                                                                               |

**Table A. Pesticide-use in selected cities across New Mexico.**

| <b>City</b>  | <b># sites contributing to adults</b> | <b># adults added to cage</b> |
|--------------|---------------------------------------|-------------------------------|
| Alamogordo   | 9                                     | 28                            |
| Carlsbad     | 8                                     | 144                           |
| Deming       | 6                                     | 28                            |
| Las Cruces   | 9                                     | 60                            |
| Lovington    | 5                                     | 20                            |
| Roswell      | 8                                     | 22                            |
| Sunland Park | 12                                    | 72                            |

**Table B. Number of founding individuals for New Mexico *Aedes aegypti* strains used in this study.** Traps were set for 24 hours at the respective sites.
